# Supplementary material
Source: PubMed Central journal article supplement (PMC7770123)

## SUPPLEMENTARY INFORMATION

### **Lymphoangiocrine signals promote cardiac growth and repair**

**Xiaolei Liu<sup>1</sup>, Ester De la Cruz<sup>2</sup>, Xiaowu Gu<sup>3</sup>, Laszlo Balint<sup>4,5</sup>, Michael Oxendine-Burns<sup>1</sup>, Tamara Terrones<sup>6</sup>, Wanshu Ma<sup>1</sup>, Hui-Hsuan Kuo<sup>7</sup>, Connor Lantz<sup>8</sup>, Trisha Bansal<sup>1</sup>, Edward Thorp<sup>8</sup>, Paul Burrige<sup>7</sup>, Zoltán Jakus<sup>4,5</sup>, Joachim Herz<sup>6,9</sup>, Ondine Cleaver<sup>3</sup>, Miguel Torres<sup>2</sup> and Guillermo Oliver<sup>1\*</sup>**

<sup>1</sup>Center for Vascular and Developmental Biology, Feinberg Cardiovascular and Renal Research Institute, Feinberg School of Medicine, Northwestern University, Chicago, IL 60611, USA.

<sup>2</sup>Cardiovascular Development Program, Centro Nacional de Investigaciones Cardiovasculares, CNIC, Madrid 28029, Spain.

<sup>3</sup>Department of Molecular Biology, University of Texas Southwestern Medical Center, Dallas, TX 75390, USA.

<sup>4</sup>Department of Physiology, Semmelweis University School of Medicine, Tuzolto utca 37-47, 1094 Budapest, Hungary.

<sup>5</sup>MTA-SE "Lendulet" Lymphatic Physiology Research Group of the Hungarian Academy of Sciences and the Semmelweis University, Department of Physiology, Semmelweis University School of Medicine, Tuzolto utca 37-47, 1094 Budapest, Hungary.

<sup>6</sup>Department of Molecular Genetics, University of Texas Southwestern Medical Center, Dallas, TX 75390, USA.

<sup>7</sup>Department of Pharmacology, Feinberg School of Medicine, Northwestern University, Chicago, IL 60611, USA.

<sup>8</sup>Department of Pathology, Feinberg Cardiovascular and Renal Research Institute, Feinberg School of Medicine, Northwestern University, Chicago, IL 60611, USA.

<sup>9</sup>Departments of Neuroscience and Neurology and Neurotherapeutics, University of Texas Southwestern Medical Center, Dallas, TX 75390, USA.

**\*Corresponding author: Guillermo Oliver, Ph.D.**, Center for Vascular and Developmental Biology, Feinberg Cardiovascular and Renal Research Institute, Feinberg School of Medicine, Northwestern University, 303 East Superior Street, Simpson-Querry Biomedical Research Center 8-519, Chicago, 60611, IL. Phone: (001) 312.503.1651. Email: guillermo.oliver@northwestern.edu

## **Supplementary Information**

Supplementary Figures 1-5 show lower magnification images for CM proliferation and apoptosis.

Supplementary Figures 6-9 show source data for Western blots.

Supplementary Figure 10 shows gating strategy for flow cytometry.

# Supplementary Figure 1

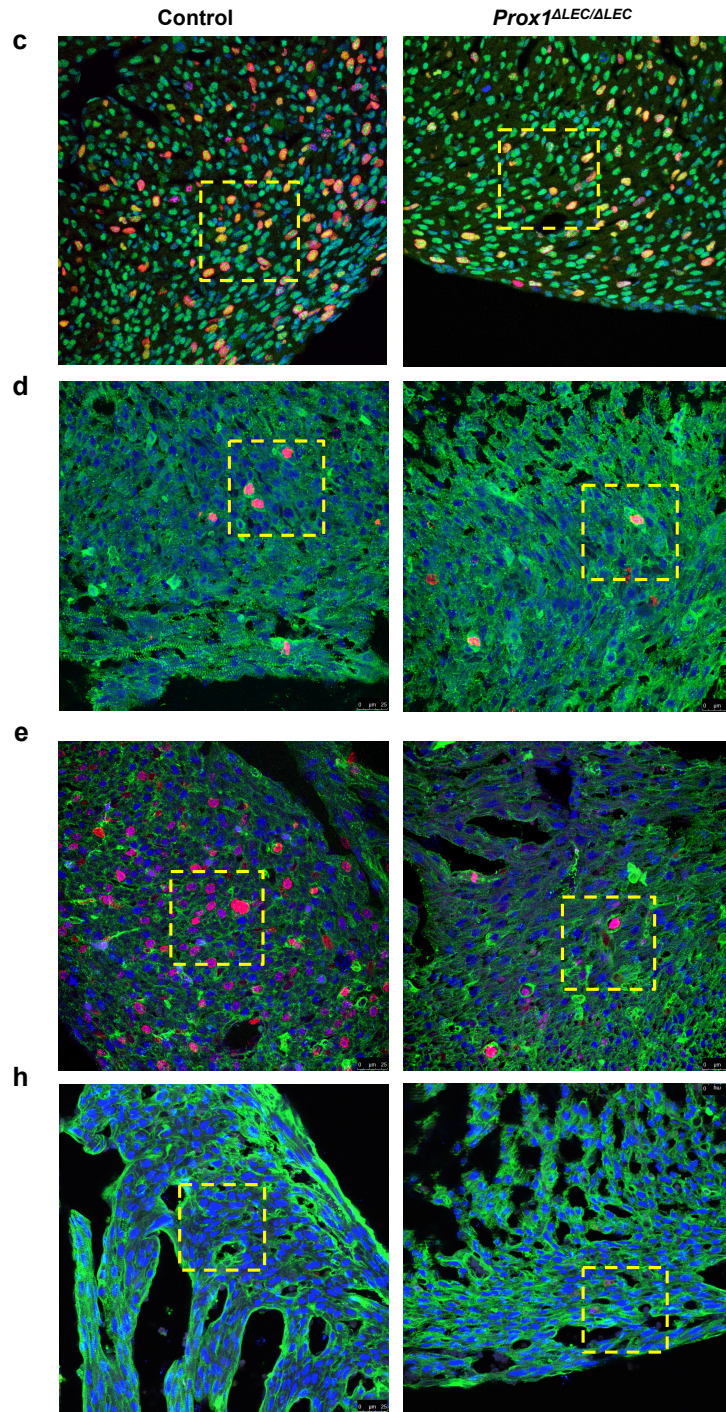

## Supplementary Figure 2

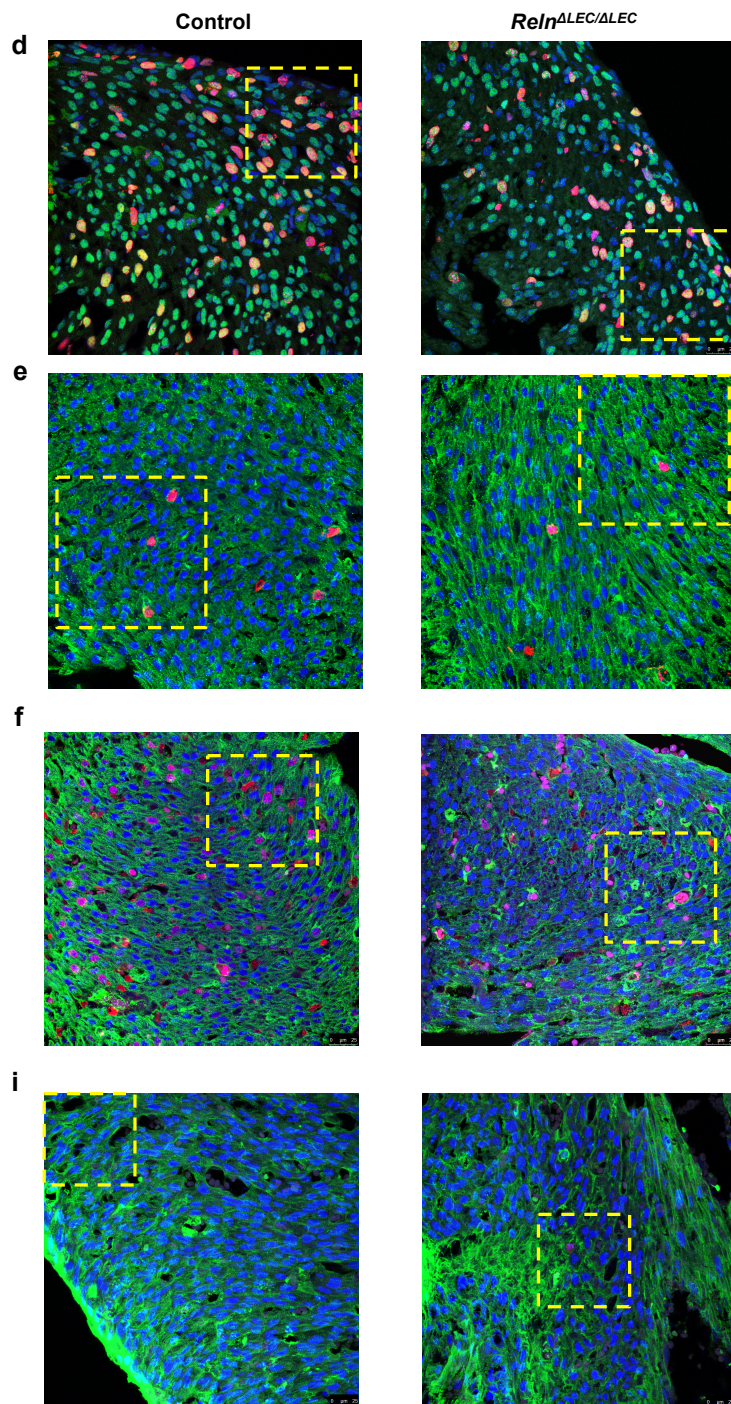

Supplementary Figure 3

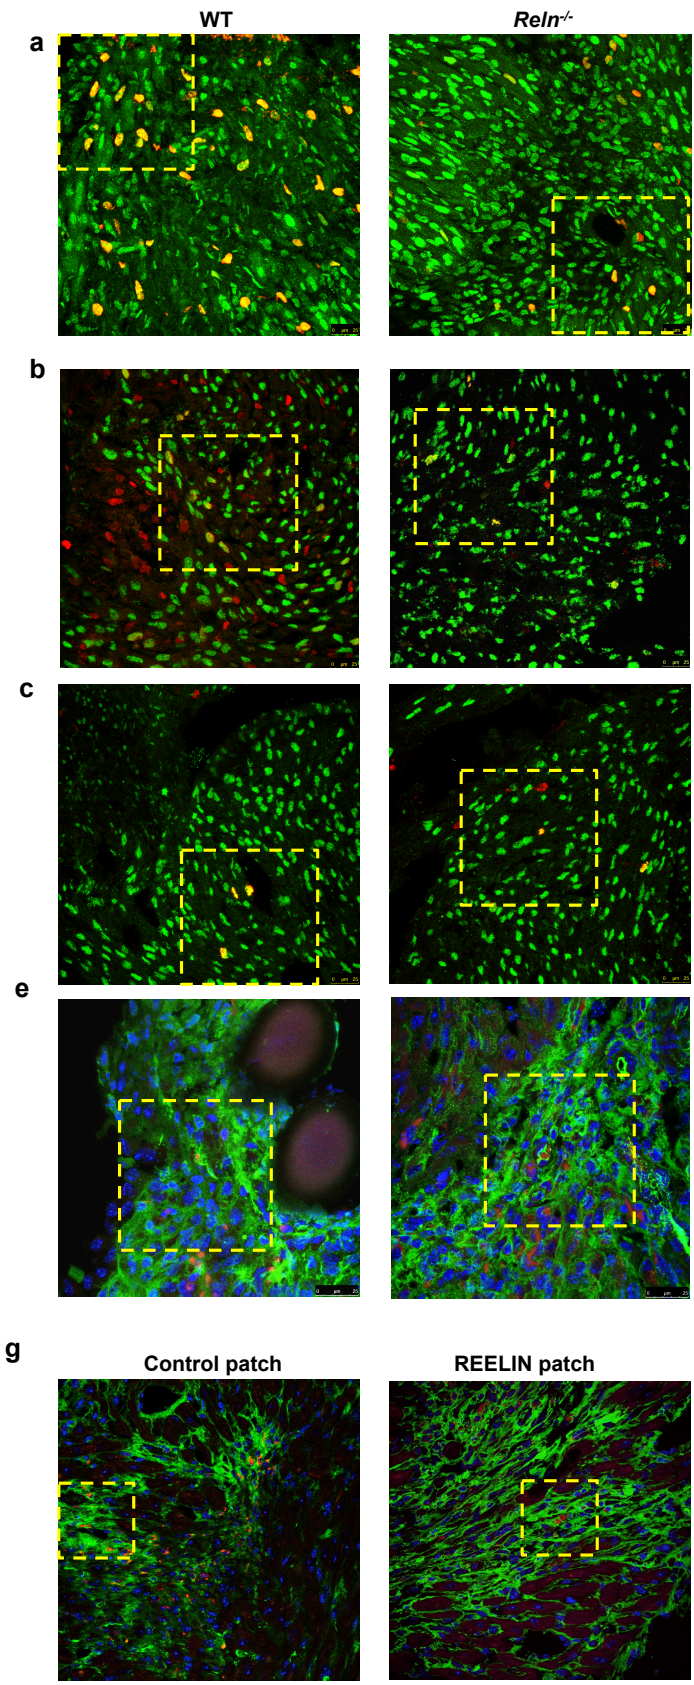

### Supplementary Figure 4

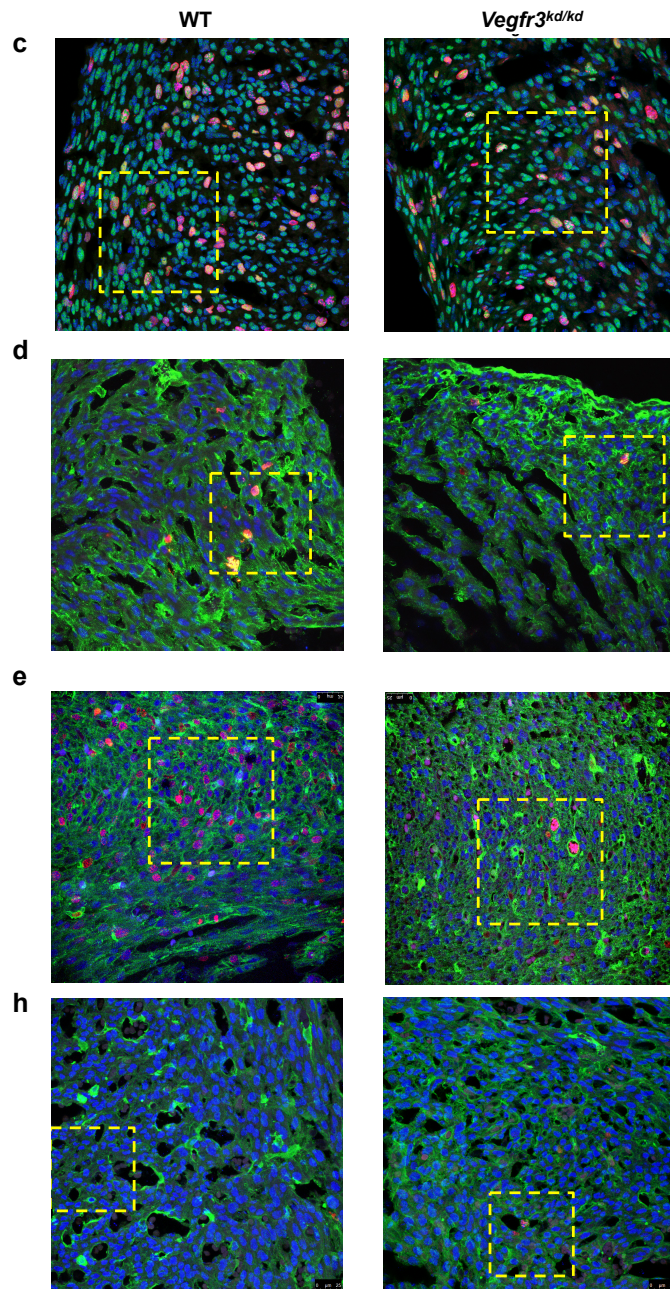

## Supplementary Figure 5

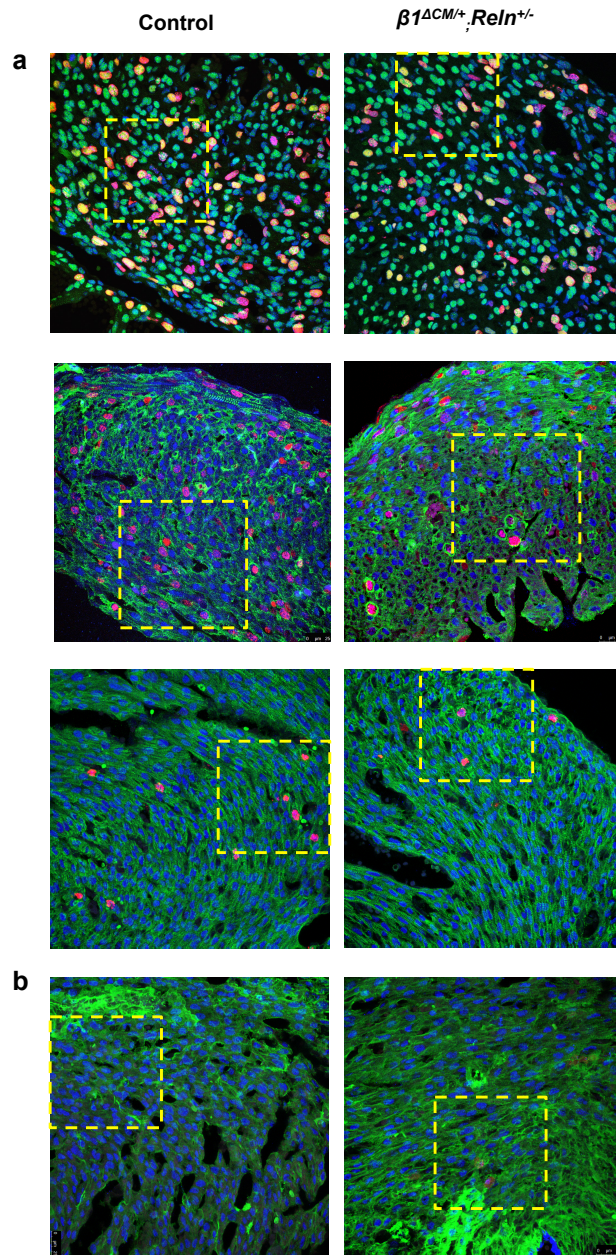

# Supplementary Figure 6

**a**

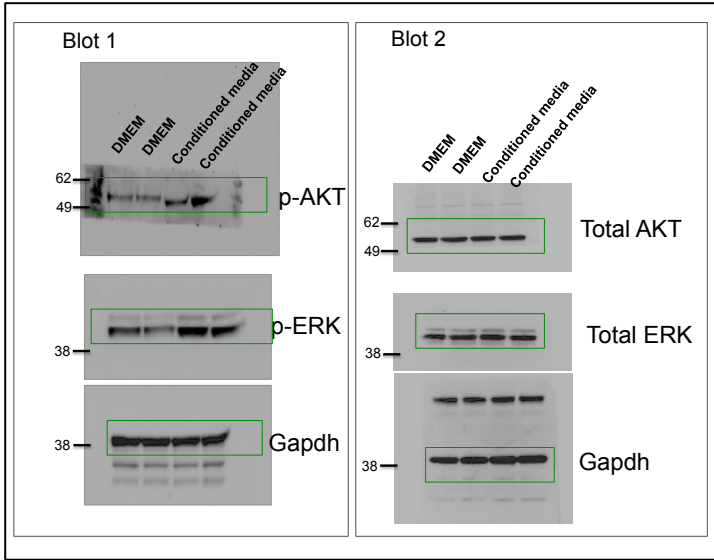

**b**

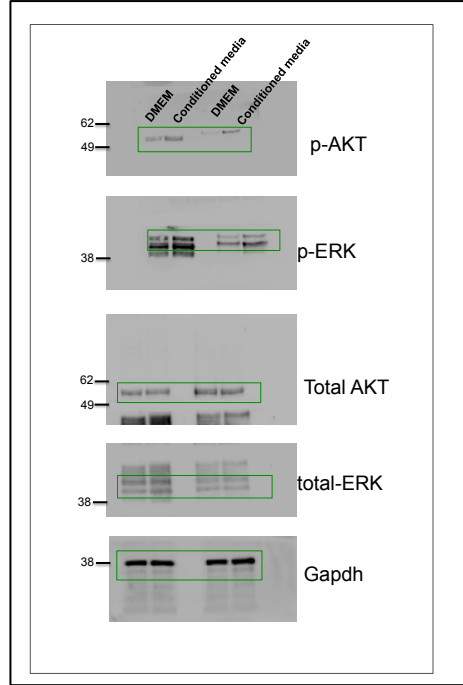



# Supplementary Figure 7

a

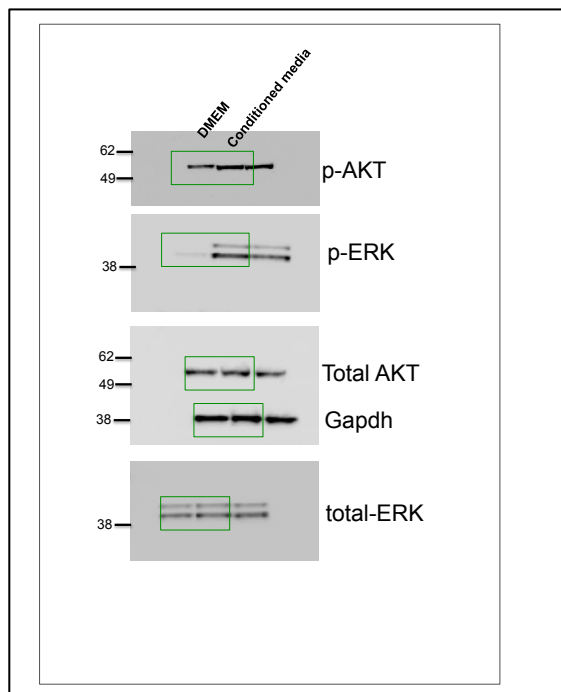

b

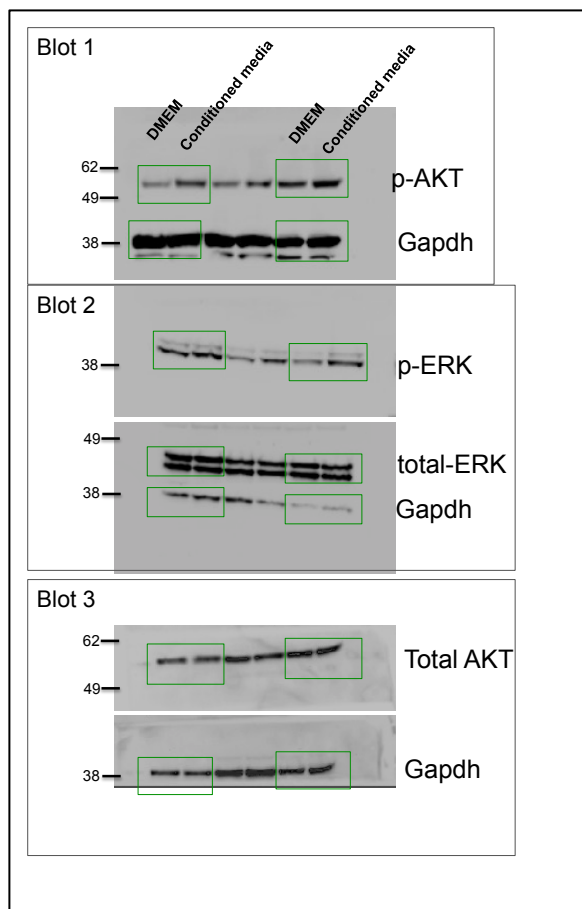

# Supplementary Figure 8

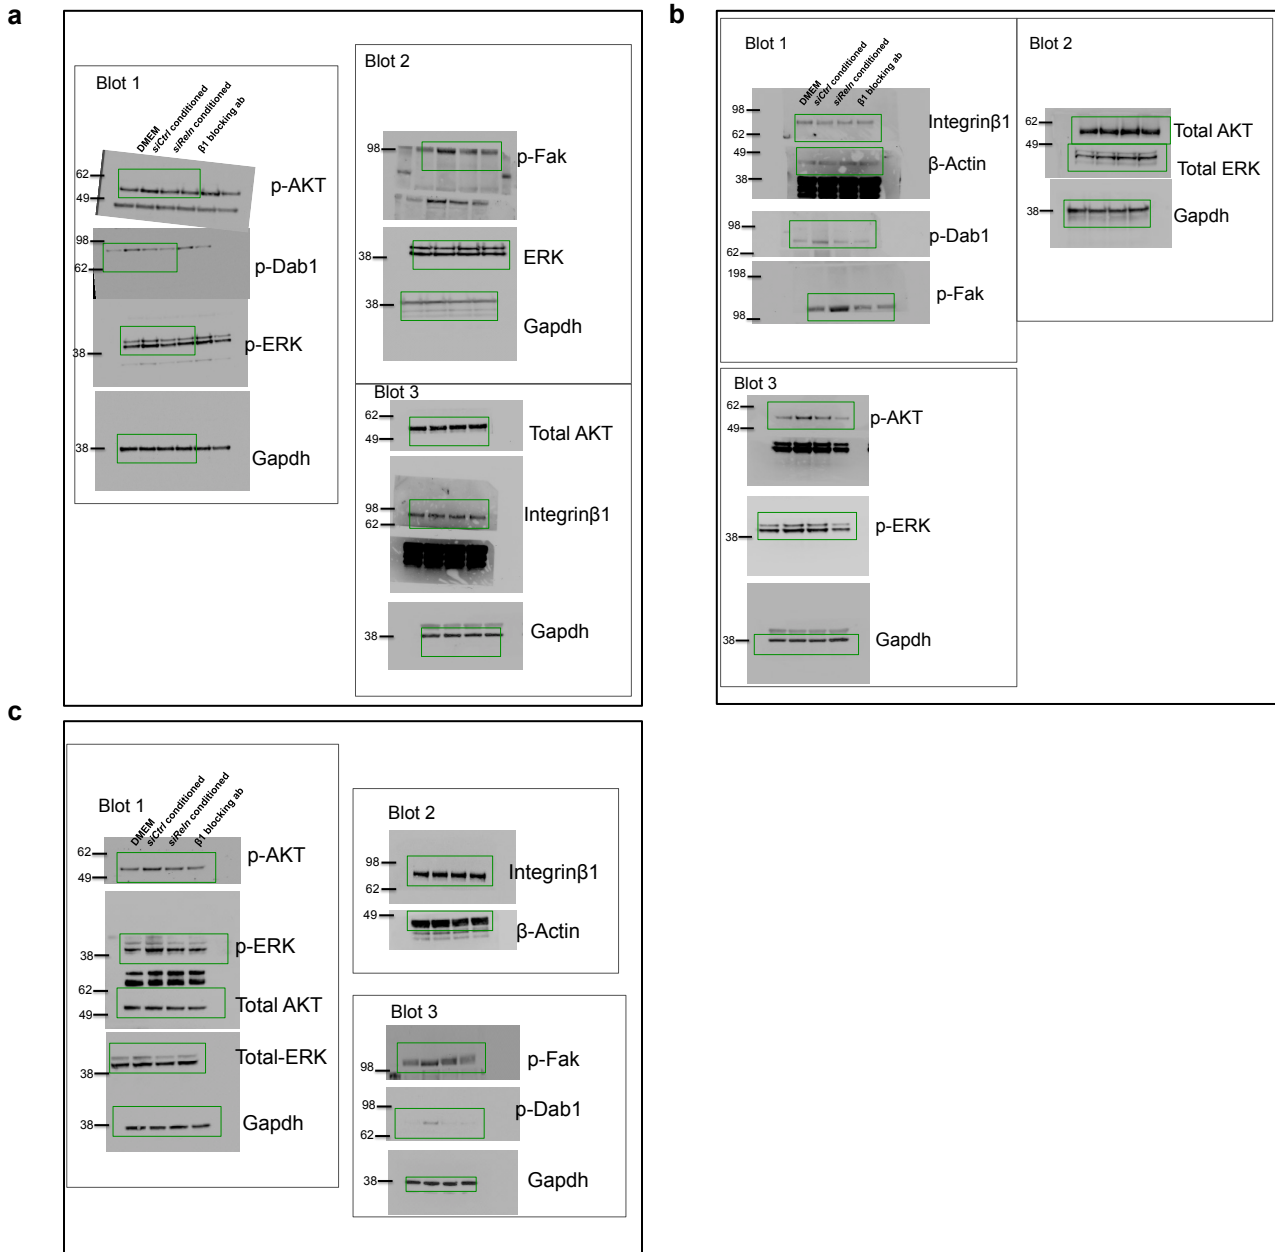

# Supplementary Figure 9

**a**

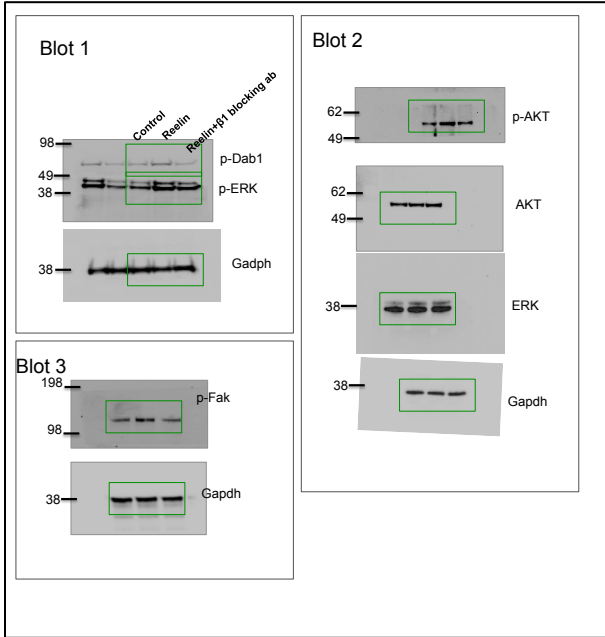

**b**

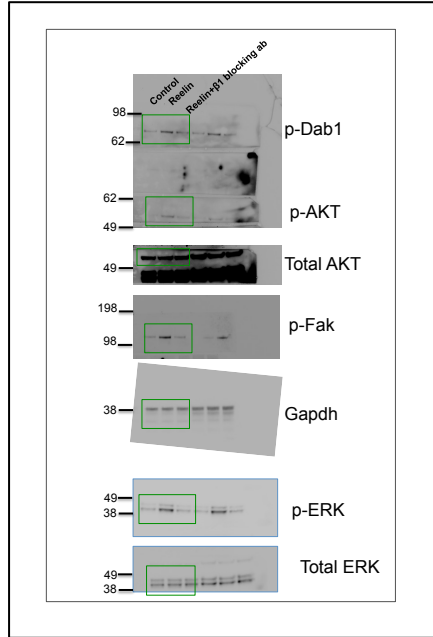

**c**

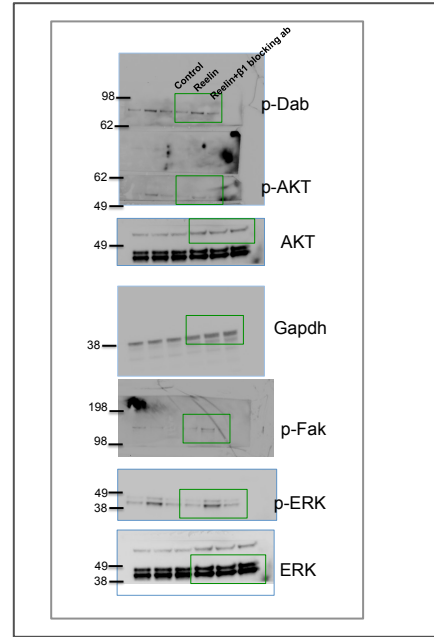

# Supplementary Figure 10

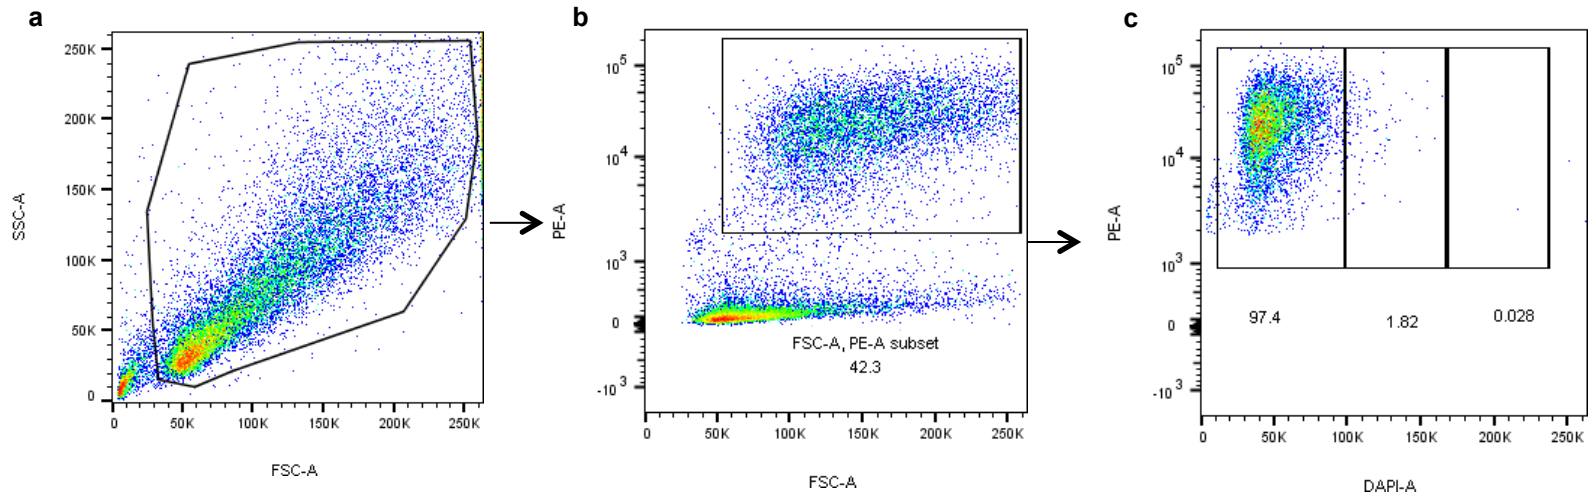

Supplement: NIHMS1635995-supplement-1.pdf [file NIHMS1635995-supplement-1.pdf]
