# Supplementary material
Source: PubMed Central journal article supplement (PMC7770123)
Supplement: NIHMS1635995-supplement-2.pdf [file NIHMS1635995-supplement-2.pdf]

# SUPPLEMENTARY INFORMATION

## Lymphoangiocrine signals promote cardiac growth and repair

Xiaolei Liu<sup>1</sup>, Ester De la Cruz<sup>2</sup>, Xiaowu Gu<sup>3</sup>, Laszlo Balint<sup>4,5</sup>, Michael Oxendine-Burns<sup>1</sup>, Tamara Terrones<sup>6</sup>, Wanshu Ma<sup>1</sup>, Hui-Hsuan Kuo<sup>7</sup>, Connor Lantz<sup>8</sup>, Trisha Bansal<sup>1</sup>, Edward Thorp<sup>8</sup>, Paul BurrIDGE<sup>7</sup>, Zoltán Jakus<sup>4,5</sup>, Joachim Herz<sup>6,9</sup>, Ondine Cleaver<sup>3</sup>, Miguel Torres<sup>2</sup> and Guillermo Oliver<sup>1\*</sup>

<sup>1</sup>Center for Vascular and Developmental Biology, Feinberg Cardiovascular and Renal Research Institute, Feinberg School of Medicine, Northwestern University, Chicago, IL 60611, USA.

<sup>2</sup>Cardiovascular Development Program, Centro Nacional de Investigaciones Cardiovasculares, CNIC, Madrid 28029, Spain.

<sup>3</sup>Department of Molecular Biology, University of Texas Southwestern Medical Center, Dallas, TX 75390, USA.

<sup>4</sup>Department of Physiology, Semmelweis University School of Medicine, Tuzolto utca 37-47, 1094 Budapest, Hungary.

<sup>5</sup>MTA-SE "Lendulet" Lymphatic Physiology Research Group of the Hungarian Academy of Sciences and the Semmelweis University, Department of Physiology, Semmelweis University School of Medicine, Tuzolto utca 37-47, 1094 Budapest, Hungary.

<sup>6</sup>Department of Molecular Genetics, University of Texas Southwestern Medical Center, Dallas, TX 75390, USA.

<sup>7</sup>Department of Pharmacology, Feinberg School of Medicine, Northwestern University, Chicago, IL 60611, USA.

<sup>8</sup>Department of Pathology, Feinberg Cardiovascular and Renal Research Institute, Feinberg School of Medicine, Northwestern University, Chicago, IL 60611, USA.

<sup>9</sup>Departments of Neuroscience and Neurology and Neurotherapeutics, University of Texas Southwestern Medical Center, Dallas, TX 75390, USA.

### \*Corresponding author:

Guillermo Oliver, PhD

Thomas D Spies Professor of Lymphatic Metabolism

Director Center for Vascular and Developmental Biology Feinberg Cardiovascular Research Institute,

Northwestern University

303 East Superior St, Simpson-Querrey Biomedical Research Center 8-519

Chicago, Illinois 60611

Phone: 312-5031651

Email: [guillermo.oliver@northwestern.edu](mailto:guillermo.oliver@northwestern.edu)

## **Supplementary Information**

Supplementary Figures 1-5 show lower magnification images for CM proliferation and apoptosis.  
Supplementary Figures 6-9 show source data for Western blots.  
Supplementary Figure 10 shows gating strategy for flow cytometry.

**Supplementary Figure 1. Lower magnification images for Figure 2.** The representative regions of images in Fig 2c, d, e and h are shown in yellow boxes.

**Supplementary Figure 2. Lower magnification images for Figure 3.** The representative regions of images in Fig 3d, e, f and i are shown in yellow boxes.

**Supplementary Figure 3. Lower magnification images for Extended Data Figure 11.** The representative regions of images in Extended Data Fig 11a, b, c, e and g are shown in yellow boxes.

**Supplementary Figure 4. Lower magnification images for Extended Data Figure 3.** The representative regions of images in Extended Data Figure 3c, d, e and h are shown in yellow boxes.

**Supplementary Figure 5. Lower magnification images for Extended Data Figure 9.** The representative regions of images in Extended Data Figure 9a and b are shown in yellow boxes.

**Supplementary Figure 6. Original western blots for Figure 3a.** The uncut blot images of Fig 3a are shown in **a**. Representative images are from two separate blots together with the loading control Gapdh. Two more independent experimental repeats are shown in **b**.

**Supplementary Figure 7. Original western blots for Figure 3b.** The uncut blot images of Fig 3b are shown in **a**. Two more independent experimental repeats are shown in **b** and images are from three different blots with loading control on each blot.

**Supplementary Figure 8. Original western blots for Extended Data Figure 8b.** The uncut blot images are shown in **a**. Representative images are from three separate blots together with loading control Gapdh. Two more independent experimental repeats are shown in **b** and **c**. Each experiment was run on three separate blots with Gapdh or  $\beta$ -Actin as loading controls.

**Supplementary Figure 9. Original western blots for Extended Data Figure 8e.** The uncut blot images are shown in **a**, representative images are from three different blots with Gapdh as loading control. Two more independent experimental repeats are shown in **b** and **c** with Gapdh as loading controls.

**Supplementary Figure 10. Gating strategy for Extended Data Figure 1c, d.** Representative flow plots from E17.5 ventricular hearts stained with PE-labeled cardiac Troponin C and Hoechst 33342. Total cell population was gated in **a**, PE-positive CMs were gated in **b** and polyploidy was gated in **c**. Gating strategy a-b were applied to all the experiments used to quantify the percentage of CMs in Extended Data Figure 1c; gating strategy from a-c were applied to all the experiments used to quantify percentages of CM polyploidy in Extended Data Figure 1d.
